# Supplementary material
Source: PubMed Central journal article supplement (PMC6353636)
Supplement: NIHMS1511839-supplement-1.pdf [file NIHMS1511839-supplement-1.pdf]

**Supplement:****Abstracted variables (used for the diagnosis of HPD in the algorithm)**

| <b>Abstracted variable</b> | <b>Categories</b>                                                                                                                   |
|----------------------------|-------------------------------------------------------------------------------------------------------------------------------------|
| <b>Delivery data</b>       |                                                                                                                                     |
| Date of delivery           |                                                                                                                                     |
| Result of pregnancy        | Live born<br>Stillborn<br>Induced abortion<br>Miscarriage<br>Unknown                                                                |
| Length of pregnancy        | Term<br>Preterm<br>Less than 20 gestational weeks<br>Unknown                                                                        |
| <b>Gestational age</b>     |                                                                                                                                     |
| <b>At each visit</b>       |                                                                                                                                     |
| Visit type                 | Prenatal<br>Hospital<br>Other<br>At admission for delivery<br>After admission, within 24 hours<br>postpartum<br>24 hours postpartum |

48 hours postpartum

72 hours postpartum

Visit date

Systolic blood pressure (highest)

Diastolic blood pressure (highest)

Antihypertensive medication /medication for preeclampsia

Dipstick protein result

### Laboratory values

Laboratory test date

Platelet count

Aspartate aminotransferase (AST)

Alanine aminotransferase (ALT)

Serum creatinine

24 hour urine protein

Protein/osmolality ratio

### Pregnancy complications

Seizures (observed in hospital or witnessed outpatient)

Persistent headaches after 20 gestational weeks

Epigastric pain after 20 gestational weeks

Change in mental status/comatose

Hyperreflexia

Other

Date of hypertension diagnosis if prior to pregnancy

---

**Hospital International Classification of Diseases Adapted (HICDA) codes utilized to identify potential cases of HPD in the study population between 1976 and 1982.**

**HICDA Codes used**

0650-0664 Full-term delivery of livebirth or stillbirth and premature delivery of livebirth or stillbirth after 20 weeks of gestation

4000-4050 Hypertension, malignant, accelerated

06370-06379 Preeclampsia, eclampsia, HELLP, toxemia

06330-06339 Intrauterine death

06343-06344 Intrauterine growth retardation

06352 Infarction, placental

06353 Insufficiency, placental (mother's history)

07600-07603 Premature infant, preterm

07640 Fetal distress before labor

07649 Birth asphyxia, unspecified

07747 High blood pressure, labile blood pressure

07756 Edema, swelling fluid retention

07700 Coma

07703 Convulsion, seizure

07733 Hyperreflexia, abnormal reflexes

**Berkson codes**

013502 Dead, fetus

013512 Maceration, fetus

013554 Still birth
